# Supplementary material for: Mouse models for V103I and I251L gain of function variants of the human MC4R display decreased adiposity but are not protected against a hypercaloric diet
Source: PubMed Central journal article supplement — Mol Metab. 2020 Sep 9;42:101077. doi: 10.1016/j.molmet.2020.101077 (PMC7559519; doi:10.1016/j.molmet.2020.101077), 2020-09-09
Supplement: mmc1.pdf [file mmc1.pdf]

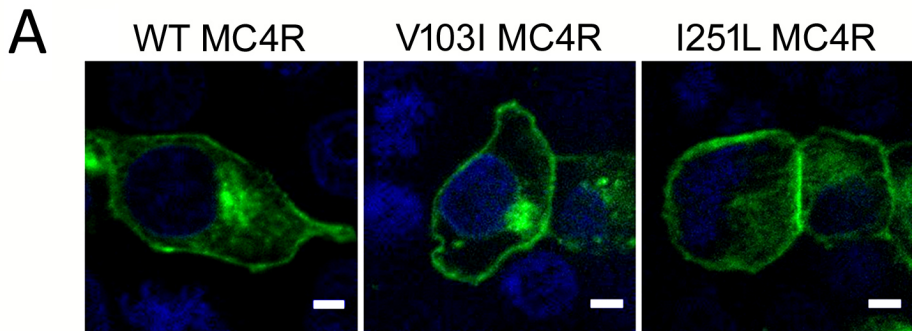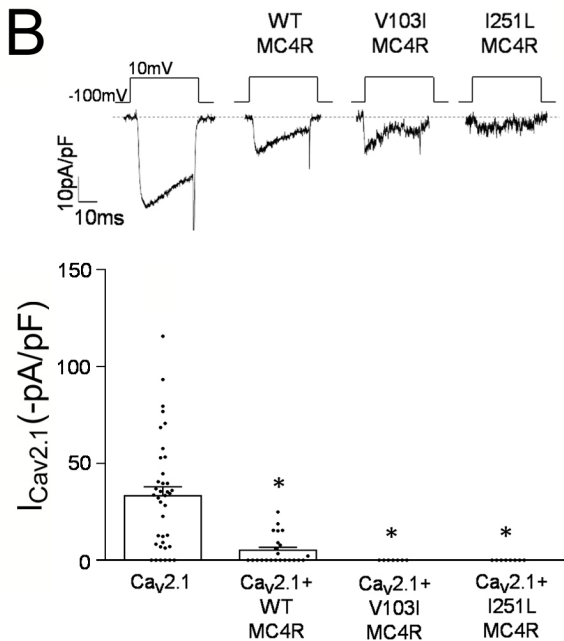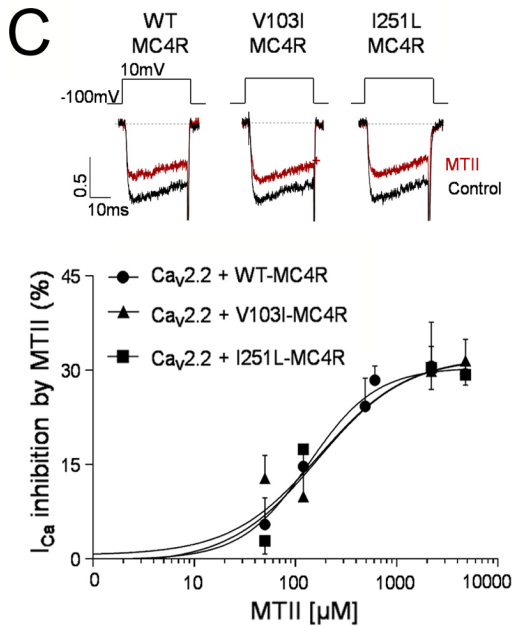

Suppl. Figure S1
